# Supplementary material for: Bioprospecting of Sea Anemones (Cnidaria, Anthozoa, Actiniaria) for β-Defensin-like α-Amylase Inhibitors
Source: MDPI journal article supplement (doi:10.3390/biomedicines11102682), 2023-09-30
Supplement: s1 [file s1]

# Bioprospecting of Sea Anemones (Cnidaria, Anthozoa, Actiniaria) for $\beta$ -Defensin-like $\alpha$ -amylase Inhibitors

**Daria Popkova, Nadezhda Otstavnykh, Oksana Sintsova, Marina Isaeva, Sergey Baldaev, Irina Gladkikh, and Elena Leychenko\***

G.B. Elyakov Pacific Institute of Bioorganic Chemistry, Far Eastern Branch, Russian Academy of Sciences, 159, Pr. 100 let Vladivostoku, 690022, Vladivostok and Russian Federation; daria.vladipo@yandex.ru (D.P.); chernysheva.nadezhda@gmail.com (N.O.); oksana.sintsova@uib.no (O.S.); baldaevsergey@gmail.com (S.B.); irinagladkikh@gmail.com (I.G.); leychenko@gmail.com (E.L.).

\*Correspondence: leychenko@gmail.com (E.L.)

**Table S1.** Designations and nucleotide sequences of the gene-specific primers used in the study.

| Designation of primer                                             | Nucleotide sequence of primer (5'→3') | Primer localization |
|-------------------------------------------------------------------|---------------------------------------|---------------------|
| Determination of the full-length magnificamide-like cDNA sequence |                                       |                     |
| InAmy1b                                                           | ATGYTAYATHAYCAYGGYGT                  | 6-CYIYHG-11         |
| InAmy2b                                                           | TGCTGYTAYAARACNCCNTGGT                | 38-CCYKTPW-44       |
| InAmyNF                                                           | CGGGATATGCAAGGCTAAGT                  | 14-GICKAK-19        |
| InAmyCF                                                           | GGTGTGTGTGAAGGCGAT                    | 31-GVCEGD-36        |
| InAmyCR_3                                                         | GTATTTTCATTATCCTGGTCG                 | 3'-untranslated     |
| InAmyCR                                                           | ATCGCCTTCACACACACC                    | 31-GVCEGD-36        |
| InAmy_5UTR_in_F                                                   | ATAAACCATCAGTGGCGAAATTCT              | 5'-untranslated     |
| InAmy_3UTR_R                                                      | TCTGAGTTTCAAAGGAGCCGT                 | 3'-untranslated     |
| Validation of the gene assembly                                   |                                       |                     |
| InAmy_5UTR_out_F                                                  | CCAGGGACAAACTCAGGCTGT                 | 5'-untranslated     |
| InAmy_NF_full_R                                                   | CAAGGGCAAGACCAACCAGAAG                | signal              |
| InAmy_NF_sig                                                      | CTTCTGGTTGGTCTTGCCCTTG                | signal              |
| InAmy_Intron2_R                                                   | ATAGCACGAGTTGCCCTCAGA                 | mature peptide      |
| Detection of intron retention                                     |                                       |                     |
| InAmy_insideIn2_R                                                 | AGTRCCACACACAATCAAACGA                | intron              |
| InAmy_insideIn3_F                                                 | CAATCCATCTCAAGAGGGATG                 | intron              |
| HmagGAPDH_F                                                       | CTCGTTTGTCGTGCTAGTTTGGA               | exon                |
| HmagGAPDH_R                                                       | CTTGACATCTCCCTTGAATCGGC               | exon                |
| HmagGAPDH_intron_F                                                | ACGCTTTATCACCATCTGTTCAT               | intron              |
| HmagGAPDH_intron_R                                                | CACCCTCCAAAGGTCCACG                   | intron              |

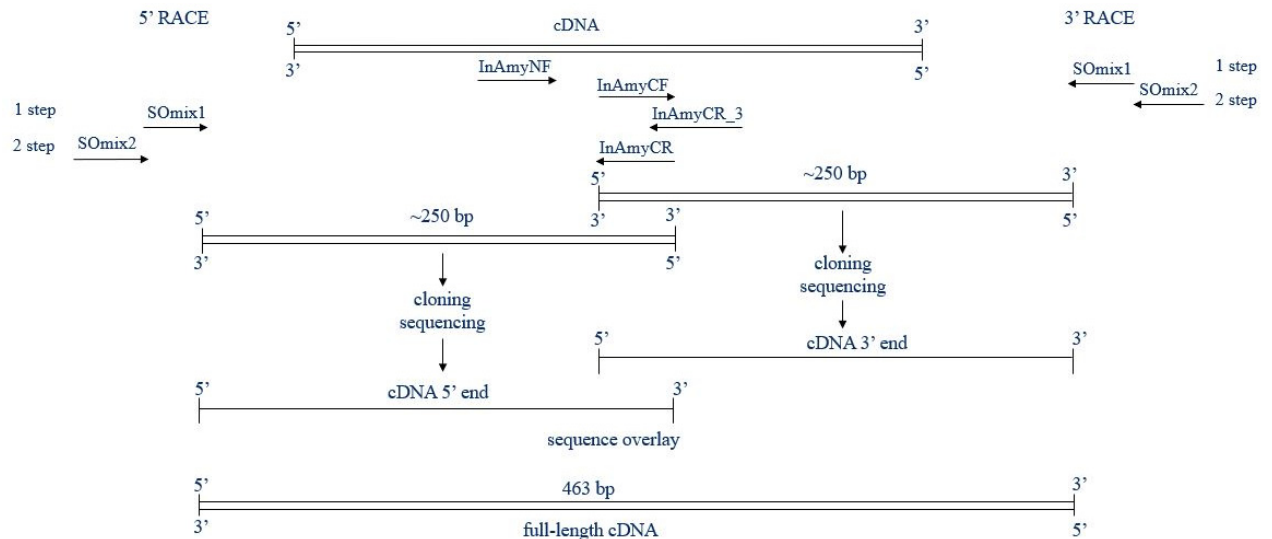

**Figure S1.** The RACE scheme for cDNA sequencing determination of magnificamides encoding genes.

DNA tagggcaagcagtggtatcaacgcagagtacgggggaataaaccatcagtggcgaaattc

DNA tactactcactgggagctttacttatcagcaaaATGAAAACTTTAATACTTCTGGTTGGT

protein **·M·K·T·L·I·L·L·V·G·**

DNA CTTGCCCTTGTTTTCTTGGCGAGTGAATGCCCGTGAATGAAGATCAAGAAATGAATTCT

protein **·L·A·L·V·F·L·A·S·G·** **·M·P·V·N·E·D·Q·E·M·N·S·**

DNA GAGGGCAACTCGTGCTATATCTACCATGGTGTGTACGGGATATGCAAGGCTAAGTGC GCG

protein ·E·G·N·S·C·Y·I·Y·H·G·V·Y·G·I·C·K·A·K·C·A·

DNA GAAGACGAAAAAGCCATGGCGGGAATGGGTGTGTGTGAAGGCGATCTCTGCTGTTATAAA

protein ·E·D·E·K·A·M·A·G·M·G·V·C·E·G·D·L·C·C·Y·K·

DNA ACACCATGGTAAtcatcggtggattttcgaccaggataatgaaatacaaaacaaataatt

protein ·T·P·W·ter

DNA gctaataatgcataccattaaaatcctttagag

**Figure S2.** cDNA obtained by Rapid Amplification of cDNA Ends and deduced magnificamide sequence. The exons are in uppercase letters, while the introns are in lowercase letters. The deduced amino acid residues are represented as single letter abbreviations. The signal peptide and propeptide are in bold letters and bold underlined, respectively. The sequence corresponding to magnificamide 1-1 is boxed.

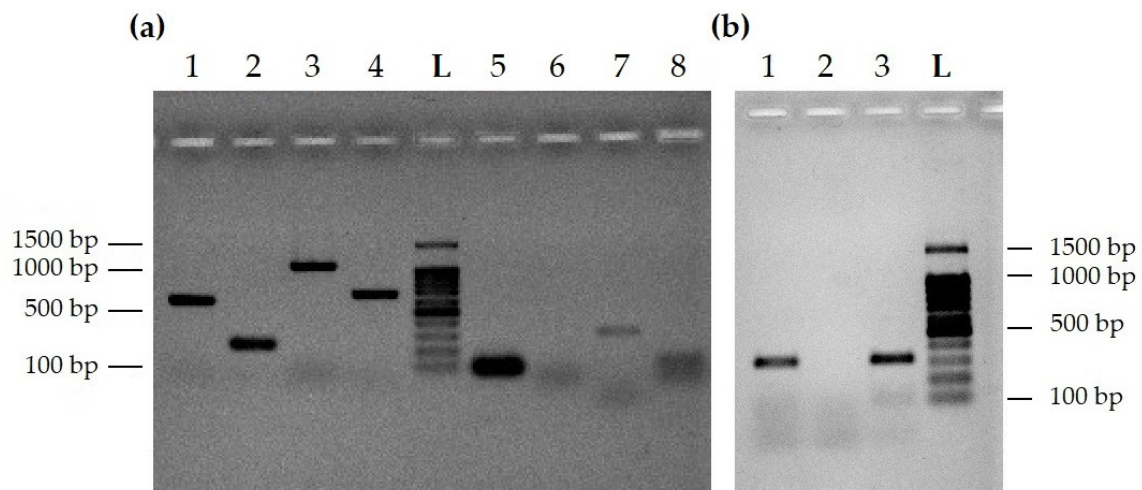

| (a) | Pair of primers                          | Template | Flanking region                         | Length    |
|-----|------------------------------------------|----------|-----------------------------------------|-----------|
| 1   | InAmy_5UTR_out_F<br>InAmy_NF_full_R      | gDNA     | 5'UTR, intron 1, part of signal peptide | 598 bp    |
| 2   | InAmy_5UTR_in_F<br>InAmy_NF_full_R       | gDNA     | 5'UTR, intron 1, part of signal peptide | 232 bp    |
| 3   | HmagGAPDH_F<br>HmagGAPDH_R               | gDNA     | Exon-intron-exon region of <i>gapdh</i> | 1084 bp   |
| 4   | HmagGAPDH_intron_F<br>HmagGAPDH_intron_R | gDNA     | Intron of <i>gapdh</i>                  | 681 bp    |
| 5   | InAmy_5UTR_in_F<br>InAmy_NF_full_R       | cDNA     | 5'UTR, intron 1, part of signal peptide | 232/93 bp |
| 6   | InAmy_NF_full_sig<br>InAmy_insideIn2_R   | cDNA     | Signal peptide, intron 2                | 553/0 bp  |
| 7   | InAmy_insideIn3_F<br>HmagGAPDH_F         | cDNA     | Intron 3, 3'UTR                         | 319/0 bp  |
| 8   | HmagGAPDH_F<br>HmagGAPDH_R               | cDNA     | Exon-intron-exon region of <i>gapdh</i> | 135 bp    |

**Figure S3.** Agarose gel images of PCR products obtained by detection of intron retention with appropriate primers (a) (Table S1) and testing of 116 and 146 tentacle samples (lanes 1 and 3, respectively) and 146 body sample (lane 2) for the presence of a third intron retained in cDNAs (b). L – 100+ bp DNA Ladder (Evrogen JSC, Russia).
